# Supplementary material
Source: PubMed Central journal article supplement (PMC7530577)

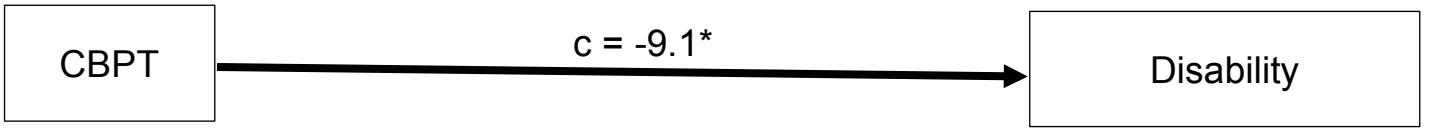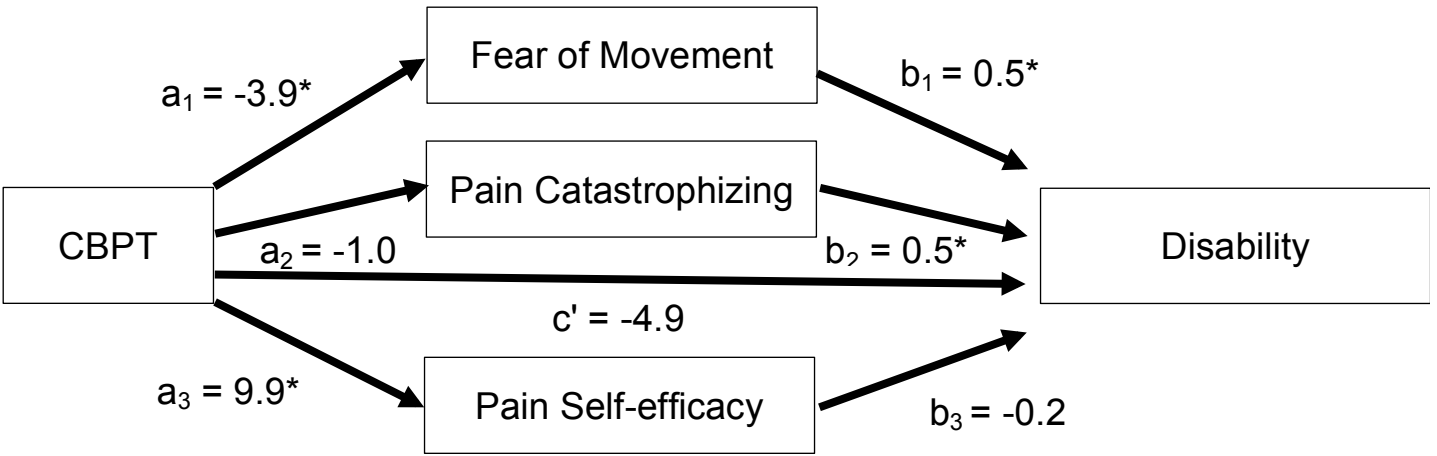

Supplement: suppl_fig_1_pzaa112.pdf [file suppl_fig_1_pzaa112.pdf]

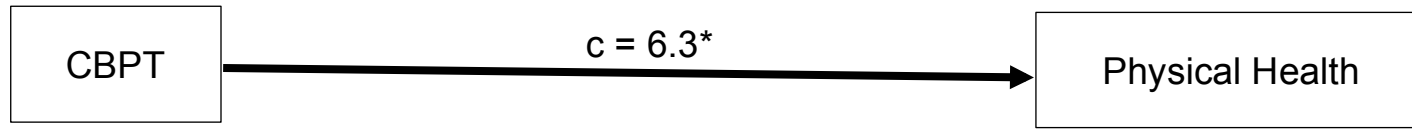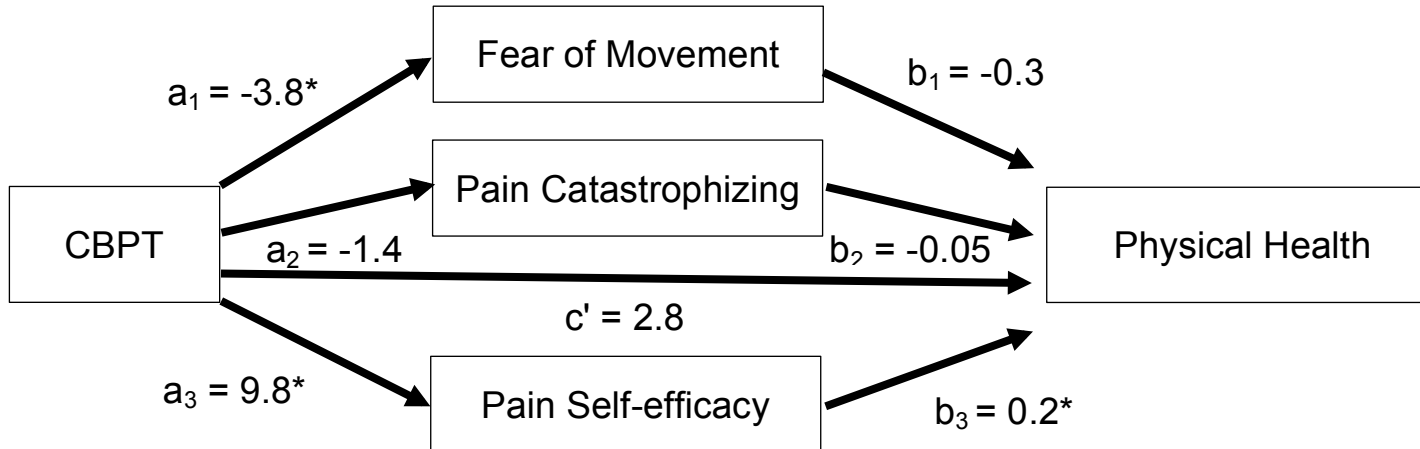

Supplement: suppl_fig_2_pzaa112.pdf [file suppl_fig_2_pzaa112.pdf]
